# Supplementary material for: Engineering and Characterization of 3-Aminotyrosine-Derived Red Fluorescent Variants of Circularly Permutated Green Fluorescent Protein
Source: MDPI journal article supplement (doi:10.3390/bios14010054), 2024-01-20
Supplement: s1 [file s1]

*Supplementary Materials*

# Engineering and Characterization of 3-Aminotyrosine-Derived Red Fluorescent Variants of Circularly Permutated Green Fluorescent Protein

Hao Zhang <sup>1,2</sup>, Xiaodong Tian <sup>1,3</sup>, Jing Zhang <sup>1,3</sup> and Hui-wang Ai <sup>1,2,3,4,\*</sup>

<sup>1</sup> Center for Membrane and Cell Physiology, University of Virginia, Charlottesville, VA 22908, USA; hz5qd@virginia.edu (H.Z.); xt3eg@virginia.edu (X.T.); jz4m@virginia.edu (J.Z.)

<sup>2</sup> Department of Chemistry, University of Virginia, Charlottesville, VA 22904, USA

<sup>3</sup> Department of Molecular Physiology and Biological Physics, University of Virginia, Charlottesville, VA 22908, USA

<sup>4</sup> The UVA Comprehensive Cancer Center, University of Virginia, Charlottesville, VA 22908, USA

\* Correspondence: huiwang.ai@virginia.edu

**Table S1.** List of oligos used in this study.

| Primer name          | Sequence (5' → 3')                                               |
|----------------------|------------------------------------------------------------------|
| E222H-f              | 5'-CATGGTCCTGCTGCACTTCGTGACCGCC-3'                               |
| E222H-r              | 5'-GGCGGTCACGAAGTGCAGCAGGACCATG-3'                               |
| 203205X-f            | 5'-CACTACCTGAGCANNKCAGNNKGTGCTGAGCAAAG-3'                        |
| 203205X-r            | 5'-CTTTGCTCAGCACMNNCTGMNNGCTCAGGTAGTG-3'                         |
| NNK <sub>x</sub> 3-f | 5'-CCGACAAGCAGAAGAACGGCATCAAGGCGAACNN-<br>KCAGATCCGCCACAACG-3'   |
| NNK <sub>x</sub> 3-r | 5'-GTTCTTCTGCTTGTCGGCGGTGATATAMNNCTTMNNGCTGTT-<br>GTACTTCTTGC-3' |
| E222X-f              | 5'-CATGGTCCTGCTGNNKTTTCGTGACCGCC-3'                              |
| E222X-r              | 5'-GGCGGTCACGAAMNNCAGCAGGACCATG-3'                               |
| 148T150L-f           | 5'-GAAGTACAACAGCACCAAGCTCTATATCACCGCC-3'                         |
| 148T150L-r           | 5'-GGCGGTGATATAGAGCTTGCTGCTGTTGTACTTC-3'                         |
| pMAH-r               | 5'-GGGTTTAAACGGGGCCCTTGGTCACGAGTTGTACTCCAGCTTG-3'                |
| pMAH-f               | 5'-CAACTGCACGGAAGCTTGCCACCATGGGCTCGAGCAAGAAG-3'                  |
| pBAD-f               | 5'-ATTAACCATGGGCTCGAG-3'                                         |
| pBAD-r               | 5'-GCCAAAACAGCCAAGCTT-3'                                         |

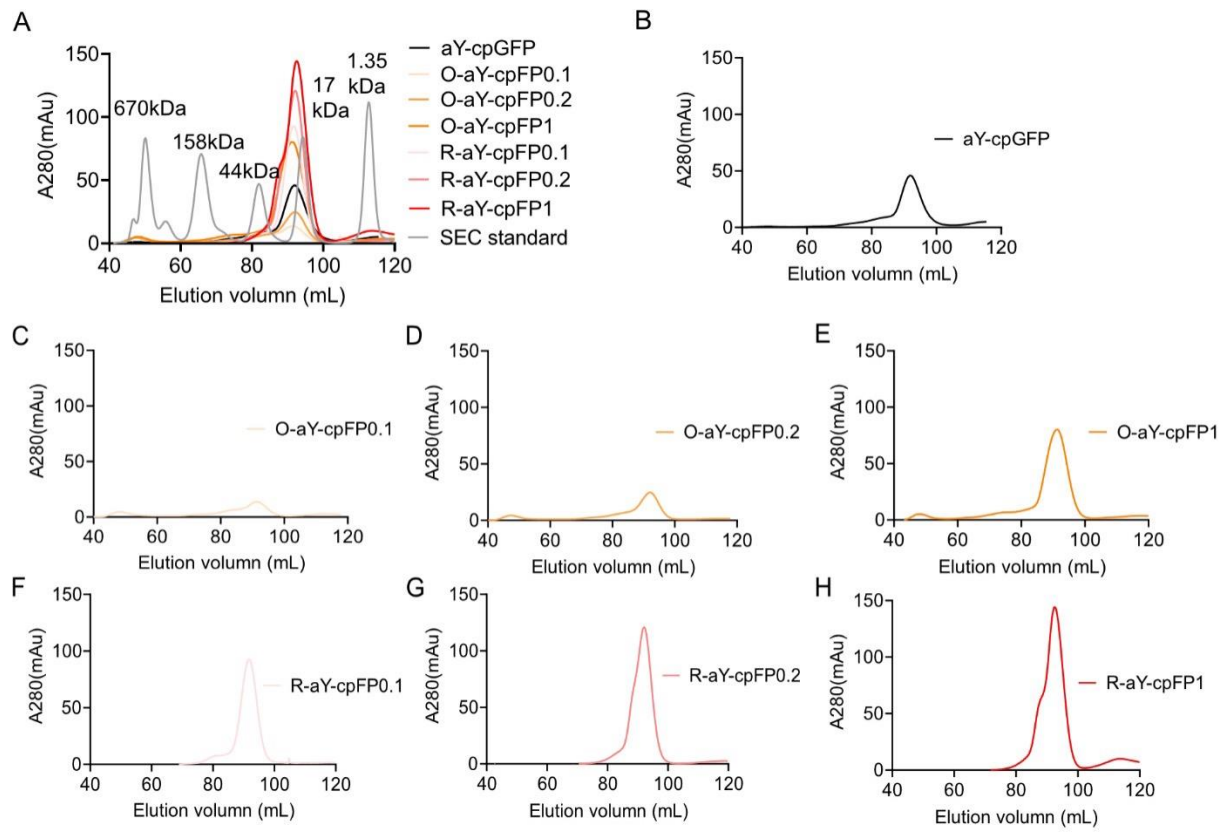

**Figure S1.** Size-exclusion chromatography (SEC) elution profiles of different mutants. The absorbance detection was at 280 nm. **(A)** Overlay of SEC standards and all mutants expressed from the same amount of culture media, **(B-G)** The SEC elution profiles of individual mutants.

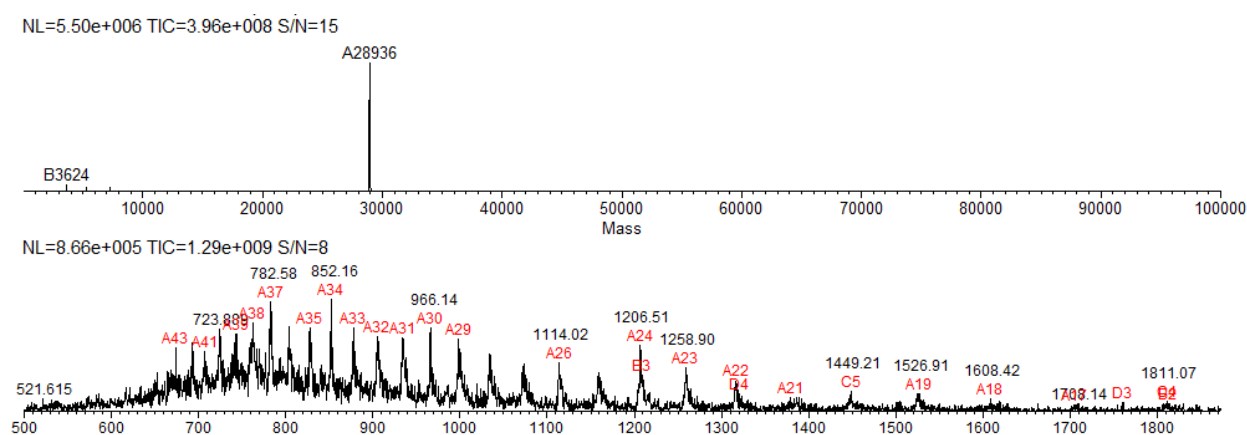

**Figure S2.** Electrospray ionization mass spectrometry (ESI-MS) analysis of intact aY-cpGFP protein (with a C-terminal His6 tag) purified from *E. coli*. The observed mass matched the calculated mass (calculated mass: 28936 Da). No peak corresponding to cpGFP with tyrosine at residue 66 (calculated mass: 28921 Da) was observed.

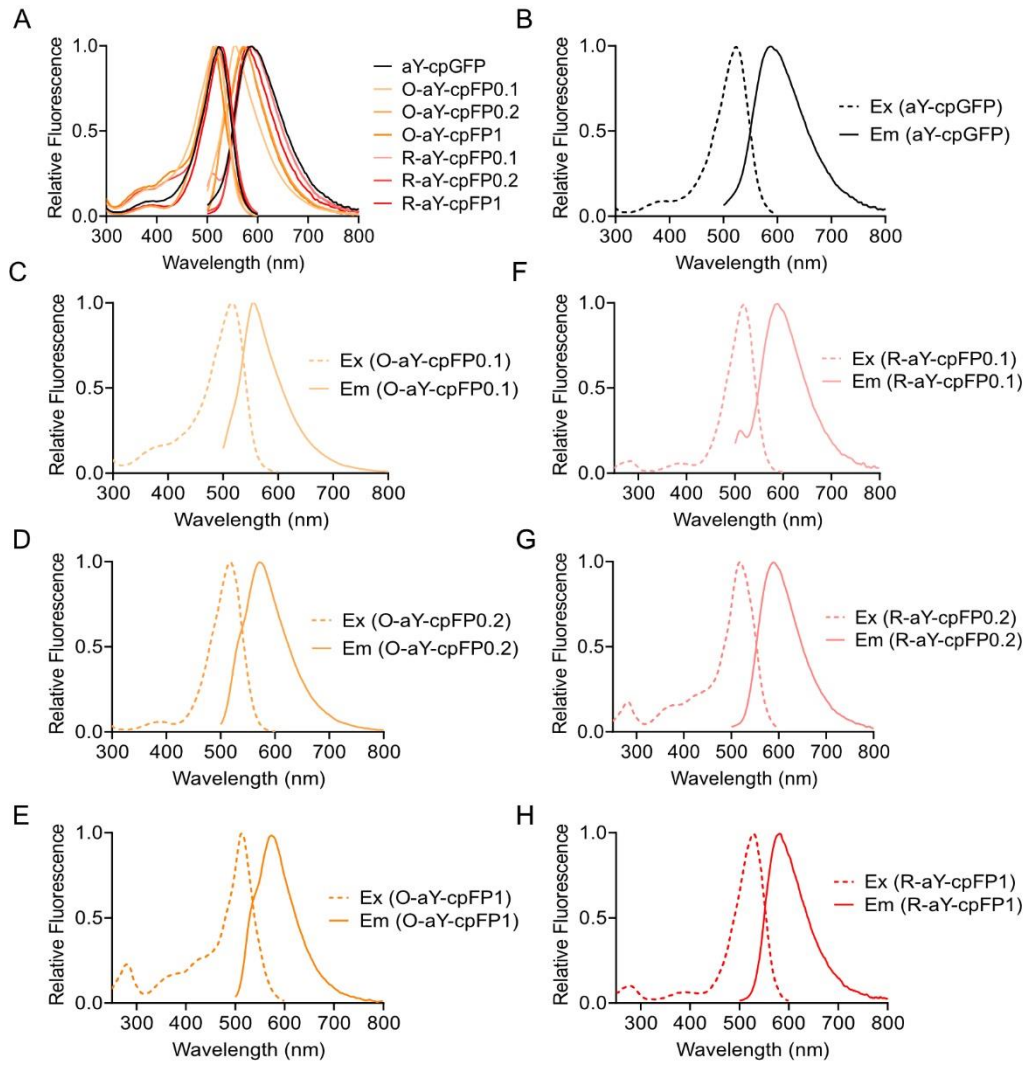

**Figure S3.** Fluorescence spectra of different aY-cpFP mutants. (A) Overlay of the fluorescence excitation and emission spectra. (B-G) Fluorescence excitation and emission spectra of individual mutants.

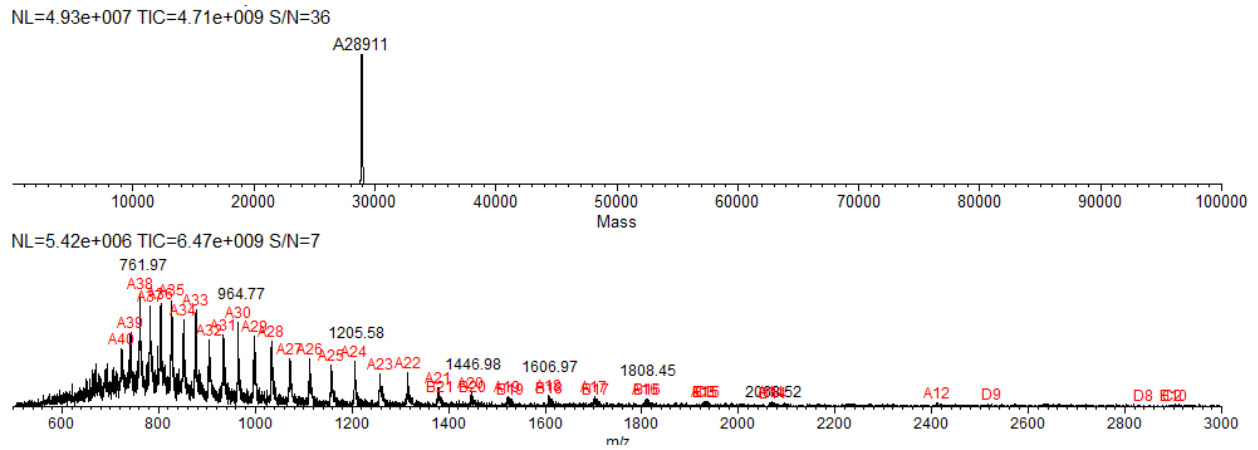

**Figure S4.** ESI-MS analysis of intact R-aY-cpFP1 protein (with a C-terminal His6 tag) purified from *E. coli*. The observed mass matched the calculated mass (calculated mass: 28912 Da).

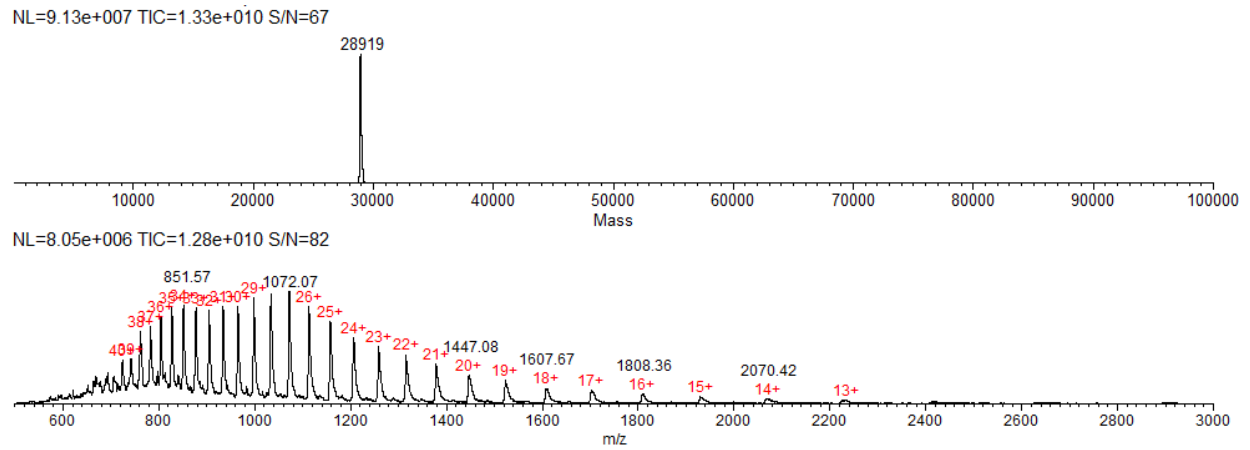

**Figure S5.** ESI-MS analysis of intact O-aY-cpFP1 protein (with a C-terminal His6 tag) purified from *E. coli*. The observed mass matched the calculated mass (calculated mass: 28919 Da).

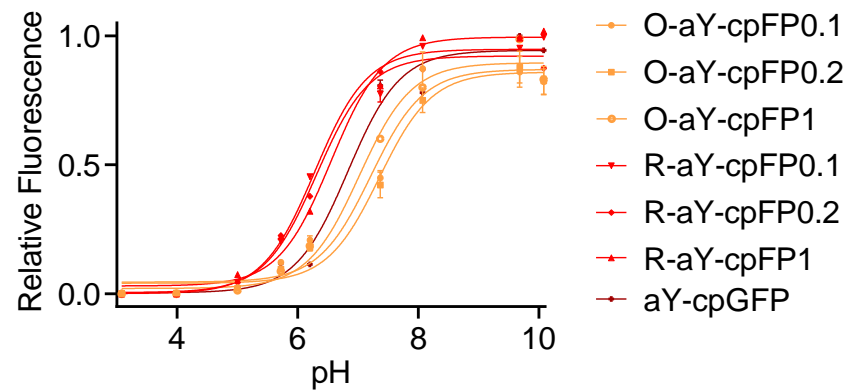

**Figure S6.** pH dependency of the fluorescence of different aY-cpFP mutants. Data are presented as mean  $\pm$  SEM of three technical replicates. Lines are the fitting of the data with the Hill equation, and apparent  $pK_a$  values (defined as the pH causing 50% of the overall fluorescence intensity change) are derived and presented in Table 1.

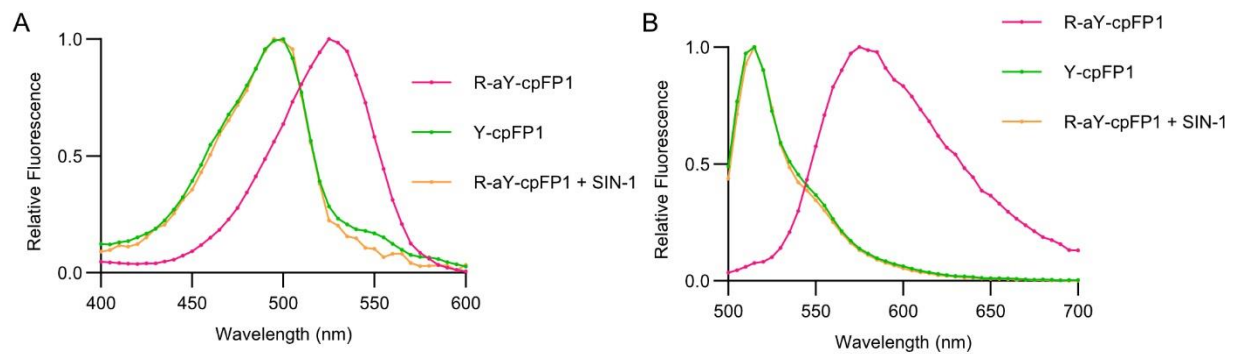

**Figure S7.** Overlay of fluorescence excitation (A) and emission (B) spectra of R-aY-cpFP1 (magenta), SIN-1-treated R-aY-cpFP1 (orange), and Y-cpFP1 (green). Y-cpFP1 has the same protein sequence as R-aY-cpFP1 except that Y-cpFP1 has a tyrosine-derived chromophore.

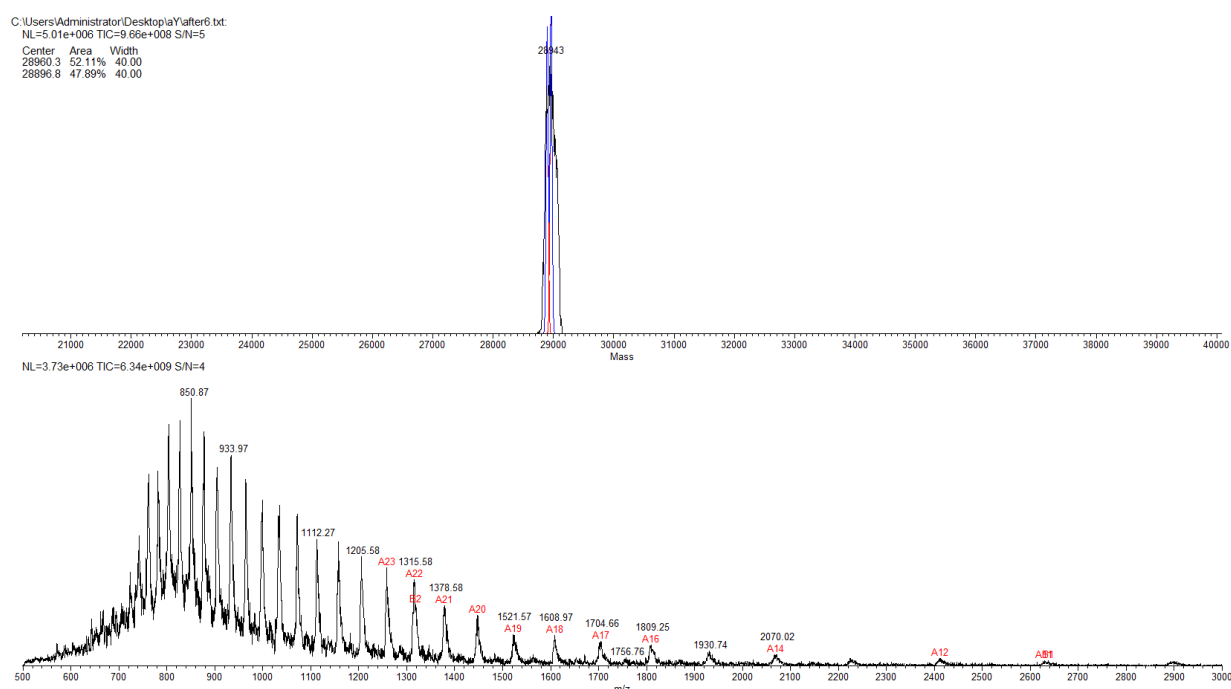

**Figure S8.** ESI-MS analysis of intact R-aY-cpFP1 protein (with a C-terminal His6 tag) after reaction with peroxynitrite. The observed mass showed two major peaks after deconvolution. One of the masses matched with the calculated mass of Y-cpFP1 (calculated mass: 28896 Da), suggesting a deamination of R-aY-cpFP1. The other mass matched with the calculated mass of nitrated R-aY-cpFP1 (calculated mass: 28960 Da), suggesting the nitration of R-aY-cpFP1.
